# Supplementary material for: Mechano-switchable, luminescent gels derived from salts of a long-chained, fatty-acid gelator
Source: Royal Society of Chemistry journal article supplement (doi:10.1039/c6cp03435g), 2016-01-01
Supplement: c6cp03435g1.pdf [file c6cp03435g1.pdf]

*Supporting Information for*  
**Mechano-switchable, Luminescent Gels Derived from Salts  
of a Long-chained, Fatty-acid Gelator**

**Mohan Zhang<sup>a</sup> and Richard G. Weiss<sup>a,b \*</sup>**

<sup>a</sup>*Department of Chemistry and* <sup>b</sup>*Institute for Soft Matter Synthesis and Metrology,*  
*Georgetown University, Washington, DC 20057-1227, USA*

**Materials and Instrumentation**

*Materials.*

9,10-Dioxooctadecanoic acid (**DODA**) was prepared according to a published procedure.<sup>1</sup> Triethylamine (Alfa Aesar, 99%), nickel(II) chloride hexahydrate (Alfa Aesar, 98%), cupric chloride (J. T. Baker Chemical), zinc chloride (Fisher Scientific, 98.6%), calcium chloride (Fisher Scientific, anhydrous), methanol (anhydrous, Sigma-Aldrich, 99.8%), ethanol (Sigma-Aldrich, 200 proof, anhydrous, 99.5%), 1-octanol (Sigma Aldrich, >99%), acetonitrile (Fisher Scientific, certified A.C.S), ethyl acetate (Sigma-Aldrich, HPLC, 99.7%), chloroform (Fisher Scientific, 99.6%), carbon tetrachloride (Fisher, HPLC 99.9%), toluene (EMD Chemicals, 99.8%), hexylbenzene (Aldrich, 97%), benzonitrile (Matheson Coleman & Bell Manufacturing Chemists, 98%), nitrobenzene (Sigma, 99%), chlorobenzene (Alfa Aesar, certified A.C.S, 99.5%), distilled water, and decane (Sigma Aldrich, >99%) were used as received.

**Syntheses**

The metal salts of 9,10-dioxooctadecanoic acid were synthesized from the acid (**DODA**), triethylamine, and a metal salt--nickel(II) chloride hexahydrate, cupric chloride, zinc chloride, or calcium chloride—using the same procedure (Scheme S1). Details for the nickel(II) 9,10-dioxooctadecanoate monohydrate (**DODA-Ni • H<sub>2</sub>O**) synthesis are presented below.

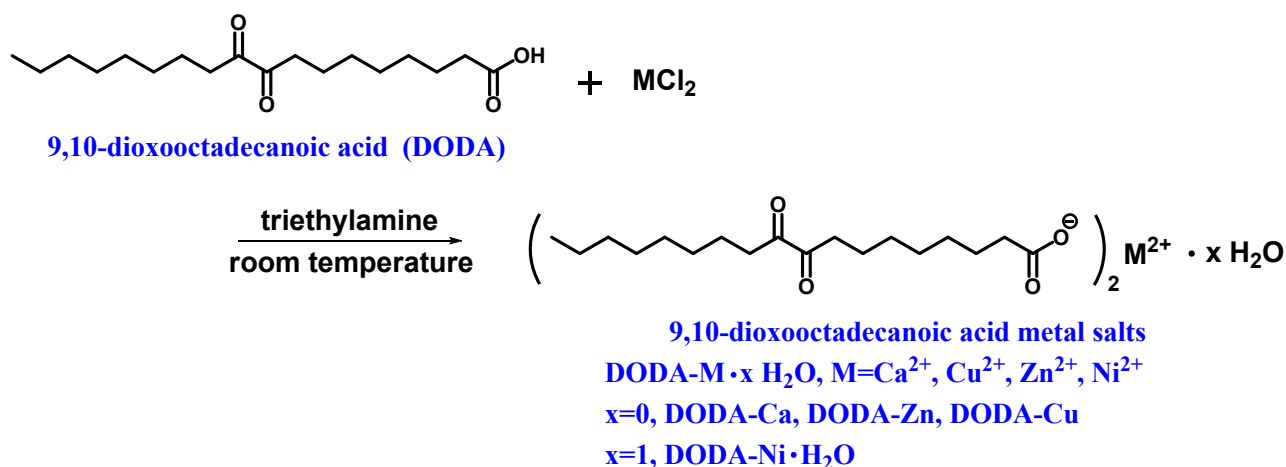

**Scheme S1.** Syntheses of 9,10-dioxooctadecanoic acid metal salts (**DODA-M · xH<sub>2</sub>O**).

**DODA** (303 mg, 0.97 mmol) was dissolved in 3 mL of chloroform. Triethylamine (98 mg, 0.96 mmol) was dissolved in 0.5 mL of chloroform separately and it was added to the **DODA** solution dropwise. The mixture was stirred for 3 h. Nickel(II) chloride hexahydrate (115 mg, 0.48 mmol) was dissolved in 0.5 mL methanol and added dropwise. The mixture was further stirred overnight and the solvent was removed under a stream of nitrogen at room temperature. The residual solid was stirred sequentially in ethyl acetate (5 mL), water (5 mL), and methanol (2 × 5 mL) for 30 min each and then vacuum filtered to yield 206 mg (61 %) of nickel(II) 9,10-dioxooctadecanoate monohydrate (**DODA-Ni · H<sub>2</sub>O**).

For **DODA-Ni · H<sub>2</sub>O**: 61 % yield of a green solid that did not melt below its decomposition temperature (139 °C, Figure S1). IR ( $\nu_{\text{max}}/\text{cm}^{-1}$ ): 2922, 2849 (C-H stretching), 1711 ( $\alpha$ -diketone,<sup>2</sup> C=O stretching), 1558 (COONi, C=O asymmetric stretching), and 1408 (COONi, C=O symmetric stretching). Elemental analysis (EA) (%) calculated for C<sub>36</sub>H<sub>64</sub>O<sub>9</sub>Ni: C, 61.81; H, 9.22; N, 0.00. Found: C, 61.93; H, 9.23; N, 0.06.

For **DODA-Ca**: 35 % yield of a yellow solid that did not melt below its decomposition temperature (130 °C, Figure S1). IR ( $\nu_{\text{max}}/\text{cm}^{-1}$ ): 2922, 2848 (C-H stretching), 1711 ( $\alpha$ -diketone,<sup>2</sup> C=O stretching), 1572 (COOCa, C=O asymmetric stretching), and 1436 (COOCa, C=O symmetric stretching). <sup>1</sup>H NMR (DMSO-d<sub>6</sub>, 400 MHz)  $\delta$  (ppm): 2.64-2.68 (t, 4H, -CH<sub>2</sub>C(=O)C(=O)-CH<sub>2</sub>-, J = 8 Hz), 2.04-2.08 (t, 2H, CH<sub>2</sub>-COOH, J = 8 Hz), 1.40-1.46 (m, 6H, -CH<sub>2</sub>CH<sub>2</sub>C(=O)C(=O)CH<sub>2</sub>CH<sub>2</sub>- and -CH<sub>2</sub>-CH<sub>2</sub>-COOH), 1.10-1.30 (m, 16H, CH<sub>2</sub>-CH<sub>2</sub>), 0.82-0.85 (t, 3H, CH<sub>3</sub>, J = 6 Hz). EA (%) calculated for C<sub>36</sub>H<sub>62</sub>O<sub>8</sub>Ca: C, 65.22; H, 9.43; N, 0.00. Found: C, 65.50; H, 9.07; N, 0.10.

For **DODA-Zn**: 69 % yield of a pale yellow solid that did not melt below its decomposition temperature (134 °C, Figure S1). IR ( $\nu_{\text{max}}/\text{cm}^{-1}$ ): 2919, 2848 (C-H stretching), 1711 ( $\alpha$ -diketone,<sup>2</sup> C=O stretching), 1544 (COOZn, C=O asymmetric stretching), and 1407 (COOZn, C=O symmetric stretching). <sup>1</sup>H NMR (DMSO-d<sub>6</sub>, 400 MHz)  $\delta$  (ppm): 2.65-2.67 (t, 4H, -CH<sub>2</sub>C(=O)C(=O)-CH<sub>2</sub>-, J

= 8 Hz), 2.03-2.07 (t, 2H,  $\text{CH}_2\text{-COOH}$ ,  $J = 8$  Hz), 1.40-1.46 (m, 6H,  $-\text{CH}_2\text{CH}_2\text{C(=O)C(=O)CH}_2\text{CH}_2-$  and  $-\text{CH}_2\text{-CH}_2\text{-COOH}$ ), 1.10-1.30 (m, 16H,  $\text{CH}_2\text{-CH}_2$ ), 0.82-0.85 (t, 3H,  $\text{CH}_3$ ,  $J = 6$  Hz). EA (%) calculated for  $\text{C}_{36}\text{H}_{62}\text{O}_8\text{Zn}$ : C, 62.82; H, 9.07; N, 0.00. Found: C, 62.73; H, 9.27; N, 0.12.

For **DODA-Cu**: 48 % yield of a blue solid that did not melt below its decomposition temperature (125 °C, Figure S1). IR ( $\nu_{\text{max}}/\text{cm}^{-1}$ ): 2920, 2848 (C-H stretching), 1711 ( $\alpha$ -diketone,<sup>2</sup> C=O stretching), 1587 (COOCu, C=O asymmetric stretching), and 1414 (COOCu, C=O symmetric stretching). EA (%) calculated for  $\text{C}_{36}\text{H}_{62}\text{O}_8\text{Cu}$ : C, 62.99; H, 9.10; N, 0.00. Found: C, 62.85; H, 9.34; N, 0.14.

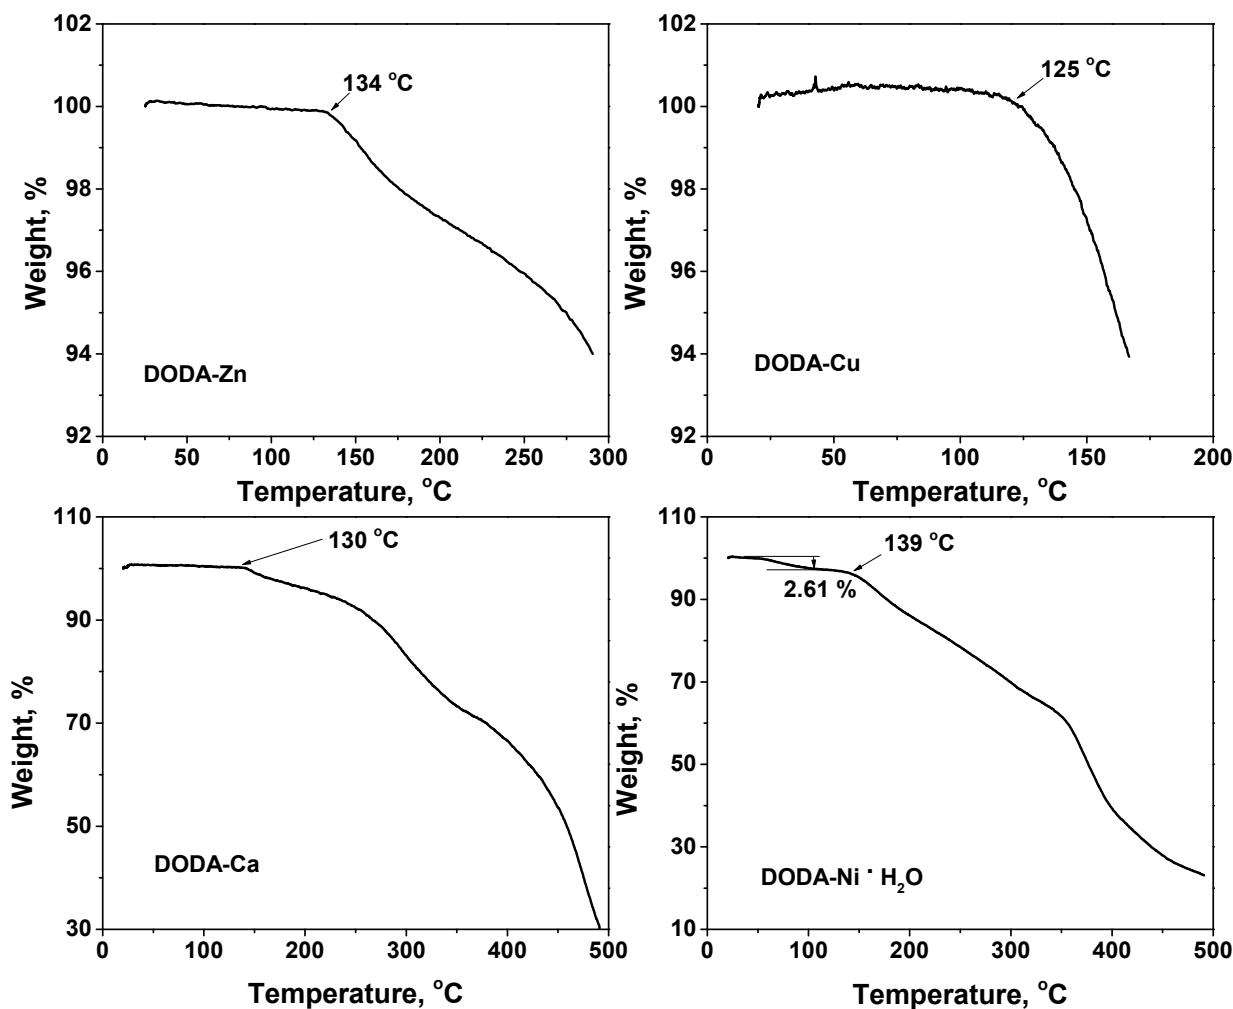

**Figure S1.** Weight loss as a function of temperature by thermal gravimetric analysis (TGA) for **DODA-M · xH<sub>2</sub>O** neat solids.

All of the **DODA** metal salts prepared started to decompose between 125 and 140 °C (Figure S1). Thus, all of the **DODA-M · xH<sub>2</sub>O** were heated no higher than 120 °C during gelation studies. There was an additional weight loss for **DODA-Ni · H<sub>2</sub>O** at 70-100 °C. This loss is consistent with the presence of a monohydrate (as indicated by the elemental analysis).

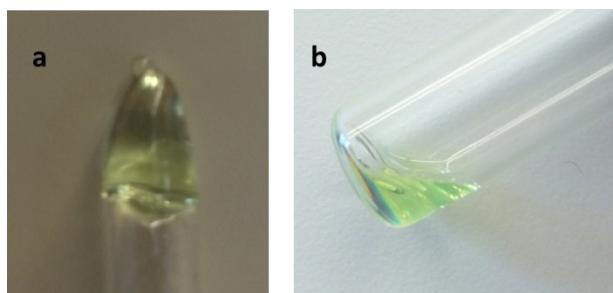

**Figure S2.** Appearance of a mixture of (a) 5 wt % **DODA-Ni • H<sub>2</sub>O** in toluene and (b) 5 wt % anhydrous **DODA-Ni** in dry toluene.

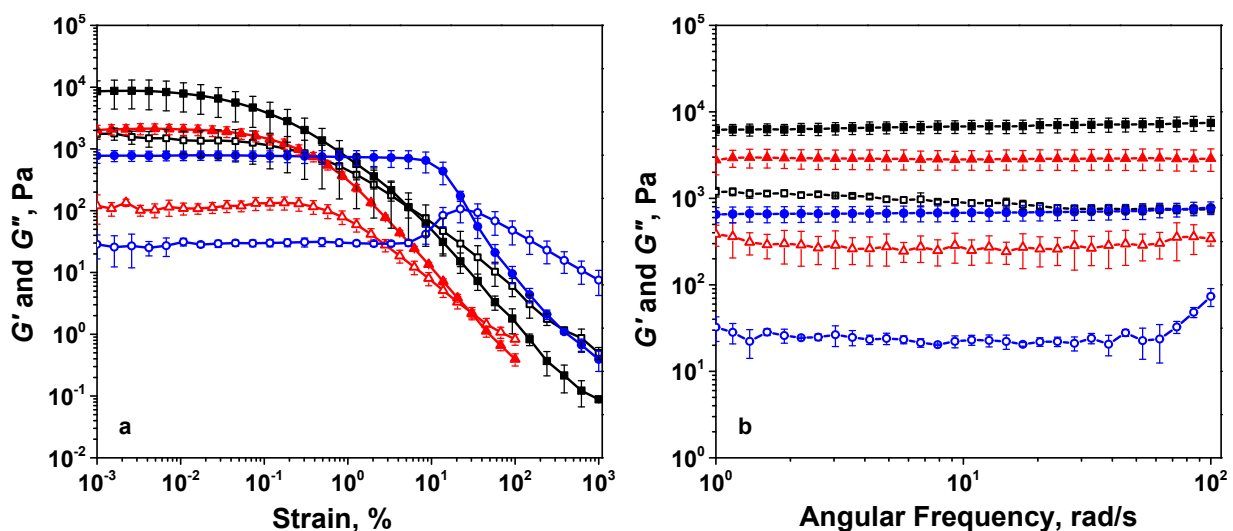

**Figure S3.** Log-log plots of strain sweeps (a, frequency = 1Hz) and angular frequency sweeps (b, strain = 0.01%) for gels of 5 wt % **DODA** (■, □),<sup>1</sup> **DODA-Cu** (▲, △), and **DODA-Ni • H<sub>2</sub>O** (●, ○) in benzonitrile.  $G'$  are closed symbols and  $G''$  are open symbols.

**Table S1.**  $G'$ ,  $G''$ ,  $\tan \delta$  (at 0.01 % strain), and yield strains (i.e., crossover points) of gels with 5 wt% gelator in benzonitrile.

| gel                             | $G''$ (Pa)           | $G'$ (Pa)             | $\tan \delta$ ( $G''/G'$ ) | crossover point (%) |
|---------------------------------|----------------------|-----------------------|----------------------------|---------------------|
| <b>DODA<sup>a</sup></b>         | 930±160 <sup>a</sup> | 6800±370 <sup>a</sup> | 0.14±0.03 <sup>a</sup>     | 5 <sup>a</sup>      |
| <b>DODA-Cu</b>                  | 290±40               | 2900±50               | 0.10±0.02                  | 25                  |
| <b>DODA-Ni • H<sub>2</sub>O</b> | 30±10                | 700±30                | 0.04±0.01                  | 28                  |

[a] From ref 1.

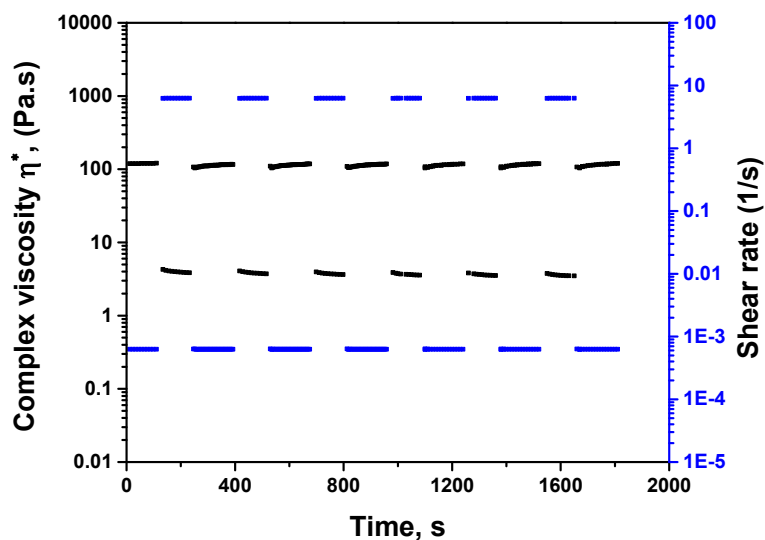

Figure S4. Complex viscosity ( $\eta^*$ ) as a function of time and application of different strains to samples in benzonitrile of 5 wt % **DODA-Ni • H<sub>2</sub>O** at 20 °C. Linear viscoelastic region (LVR):  $\gamma = 0.01$  %,  $f = 1$  Hz; destructive strain region (DS):  $\gamma = 100$  %,  $f = 1$  Hz. Rotational strain was kept at 0 % for 1 s before changing from DS to LVR conditions. Data points were collected every 1 s after the cessation of destructive strain.

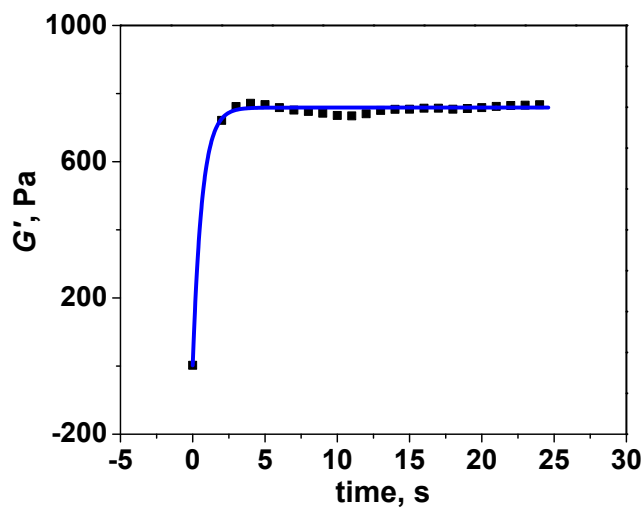

**Figure S5.** The best fit to a single exponential rise (blue line)<sup>3, 4</sup> for the recovery data of  $G'$  (dots, data averaged from 6 cycles, starting from the first cycle) for a gel of 5 wt % **DODA-Ni • H<sub>2</sub>O** in

benzonitrile at 20 °C after cessation of destructive strain (DS) and return to the linear viscoelastic (LVR) condition.

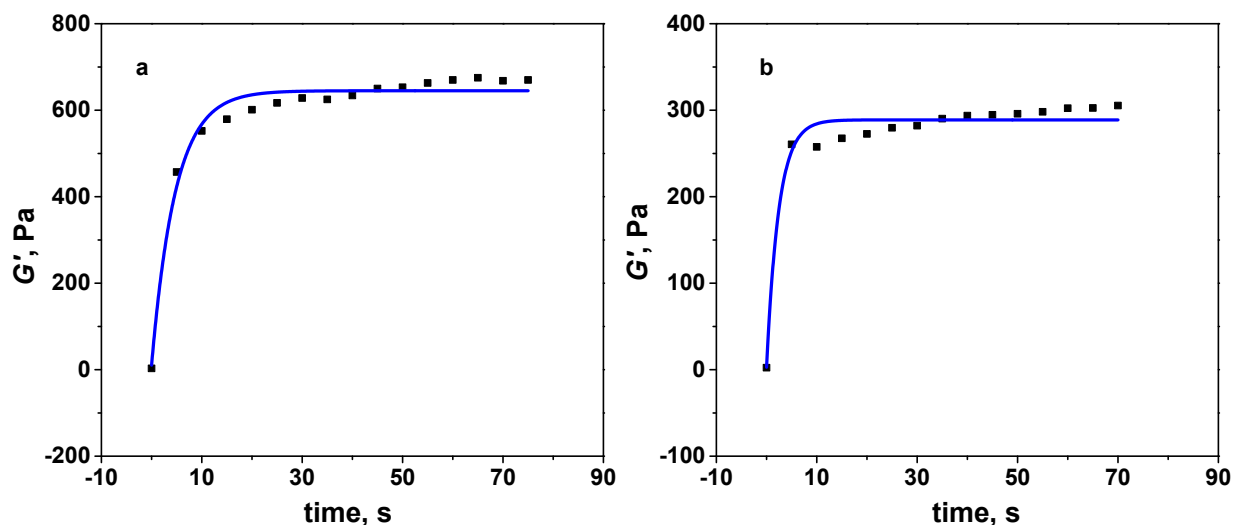

**Figure S6.** The best fit to a single exponential rise (blue lines)<sup>3, 4</sup> for the recovery data of  $G'$  (dots) for a gel of 5 wt % **DODA-Cu** in benzonitrile at 20 °C after cessation of DS and return to the LVR condition. (a) Data collected from the first cycle. (b) Data averaged from 6 cycles, starting from the second cycle.

**Table S2.** Thixotropic parameters related to gels of 5 wt % **DODA-Cu** and **DODA-Ni • H<sub>2</sub>O** gels in benzonitrile: recovery times ( $\tau$ ), % of thixotropic recovery and loss tangent after different numbers of LVR-DS cycles.

|                                                                                     | $\tau$ (s) | % of thixotropic recovery <sup>a</sup> | $\tan \delta (G'' / G')$ |
|-------------------------------------------------------------------------------------|------------|----------------------------------------|--------------------------|
| <b>DODA-Ni • H<sub>2</sub>O</b><br>average of all cycles                            | < 3        | ~100 %                                 | 0.04±0.03                |
| <b>DODA-Cu</b><br>1 <sup>st</sup> cycle                                             | < 10       | ~20 %                                  | 0.13±0.03                |
| <b>DODA-Cu</b><br>average of 6 cycles<br>starting from the 2 <sup>nd</sup><br>cycle | < 5        | ~10 %                                  | 0.14±0.03                |

<sup>a</sup> percentage recovery of the  $G'$  value taking the initial  $G'$  value as 100 %.

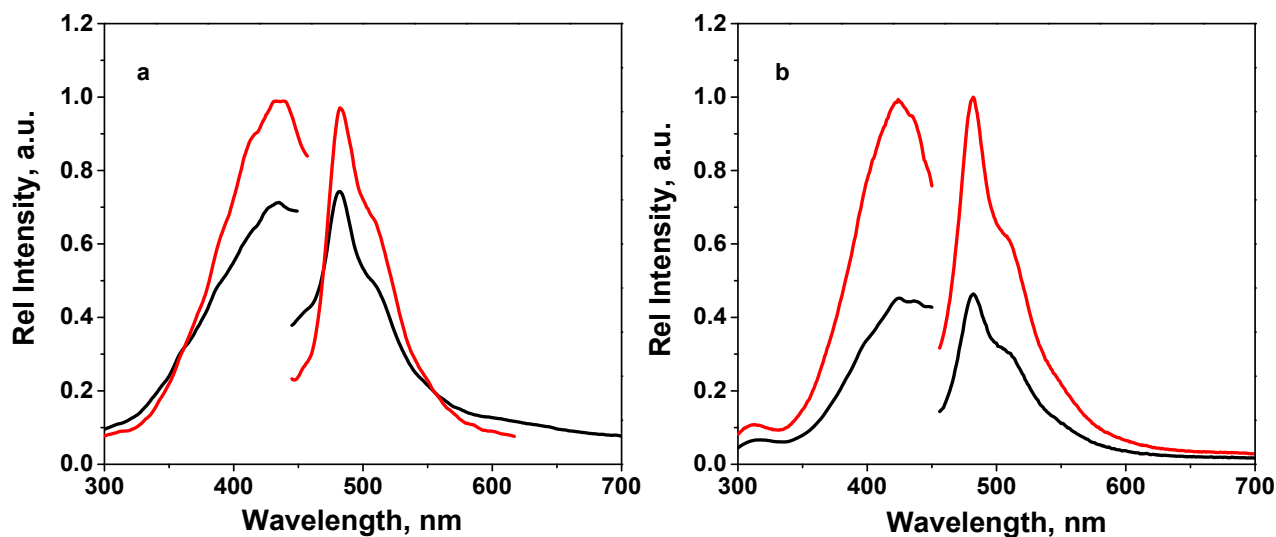

**Figure S7.** Excitation ( $\lambda_{em}$  481 nm) and emission spectra ( $\lambda_{ex}$  425 nm) of (a) a 5 wt % **DODA-Cu** in  $\text{CCl}_4$  gel at 25 °C (black) and its sol at 70 °C (red); (b) a 5 wt % **DODA-Ni · H<sub>2</sub>O** in 1-octanol gel at 25 °C (red) and its sol at 80 °C (red).

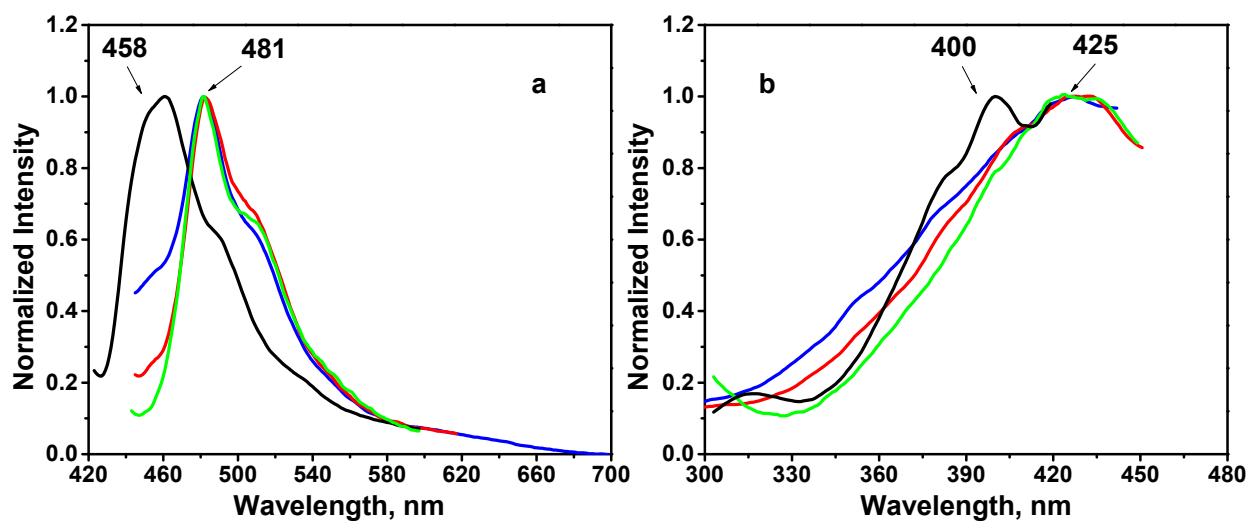

**Figure S8.** Normalized (a) emission and (b) excitation spectra of a 5 wt% **DODA-Cu** in  $\text{CCl}_4$  gel at 25 °C (red,  $\lambda_{em}$  481 nm,  $\lambda_{ex}$  425 nm), its sol at 70 °C (blue,  $\lambda_{em}$  481 nm,  $\lambda_{ex}$  425 nm), a 5 wt% **DODA** in  $\text{CCl}_4$  gel at 25 °C (black,  $\lambda_{em}$  458 nm,  $\lambda_{ex}$  400 nm), and its sol at 45 °C (green,  $\lambda_{em}$  481 nm,  $\lambda_{ex}$  425 nm).

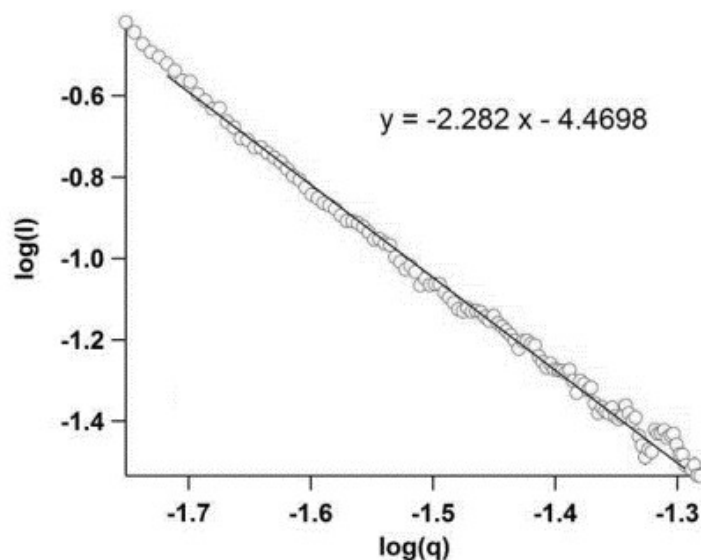

**Figure S9.** Porod plot of SAXS data in the high  $q$  region ( $0.019$ - $0.052 \text{ \AA}^{-1}$ ) for a gel of 5 wt% **DODA-Ni • H<sub>2</sub>O** in benzonitrile.

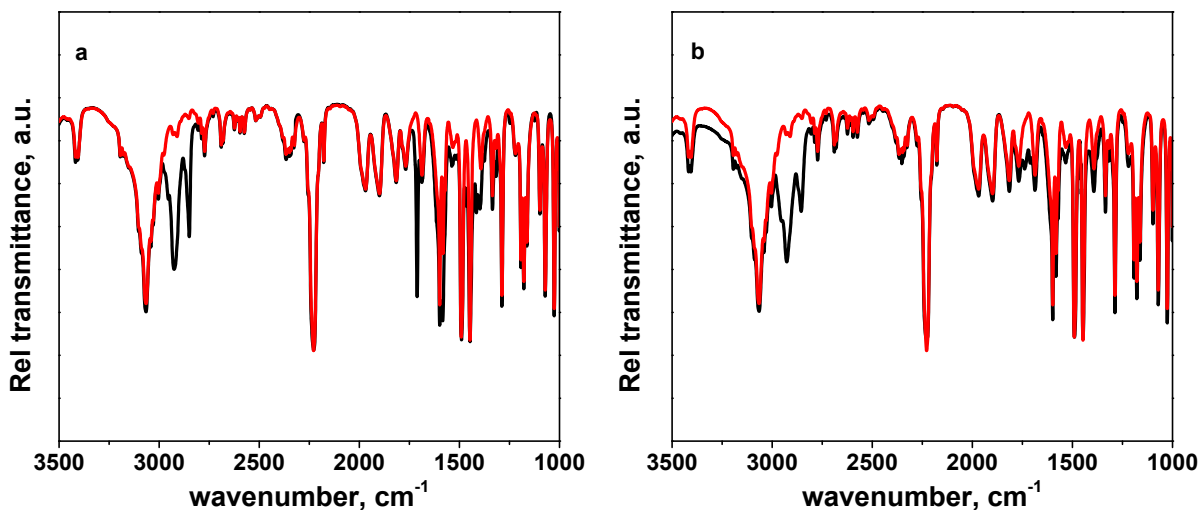

**Figure S10.** FT-IR spectra of (a) gels of 5 wt % **DODA-Cu** (black) in benzonitrile without empirical subtraction of the benzonitrile peaks and neat benzonitrile (red); (b) gels of 5 wt % **DODA-Ni • H<sub>2</sub>O** (black) in benzonitrile without empirical subtraction of the benzonitrile peaks and neat benzonitrile (red).

**Table S3.** Wavenumbers of symmetrical and asymmetrical stretching bands of carboxylate groups, and the assigned major coordination modes (see main text) from FT-IR spectra of neat **DODA** salts and 5 wt% gels in benzonitrile. .

|                       | $\nu_{\text{asym}} \text{OCO}$ | $\nu_{\text{sym}} \text{OCO}$ | Separation            | coordination type |
|-----------------------|--------------------------------|-------------------------------|-----------------------|-------------------|
| <b>DODA-Ca</b> (neat) | $1572 \text{ cm}^{-1}$         | $1409 \text{ cm}^{-1}$        | $163 \text{ cm}^{-1}$ | bridging          |

|                                      |                       |                       |                      |           |
|--------------------------------------|-----------------------|-----------------------|----------------------|-----------|
| <b>DODA-Zn</b> (neat)                | 1544 $\text{cm}^{-1}$ | 1407 $\text{cm}^{-1}$ | 137 $\text{cm}^{-1}$ | chelating |
| <b>DODA-Cu</b> (neat)                | 1587 $\text{cm}^{-1}$ | 1414 $\text{cm}^{-1}$ | 173 $\text{cm}^{-1}$ | bridging  |
| <b>DODA-Cu</b> (gel)                 | 1588 $\text{cm}^{-1}$ | 1415 $\text{cm}^{-1}$ | 173 $\text{cm}^{-1}$ | bridging  |
| <b>DODA-Ni·H<sub>2</sub>O</b> (neat) | 1560 $\text{cm}^{-1}$ | 1410 $\text{cm}^{-1}$ | 150 $\text{cm}^{-1}$ | bridging  |
| <b>DODA-Ni·H<sub>2</sub>O</b> (gel)  | 1562 $\text{cm}^{-1}$ | 1412 $\text{cm}^{-1}$ | 150 $\text{cm}^{-1}$ | bridging  |

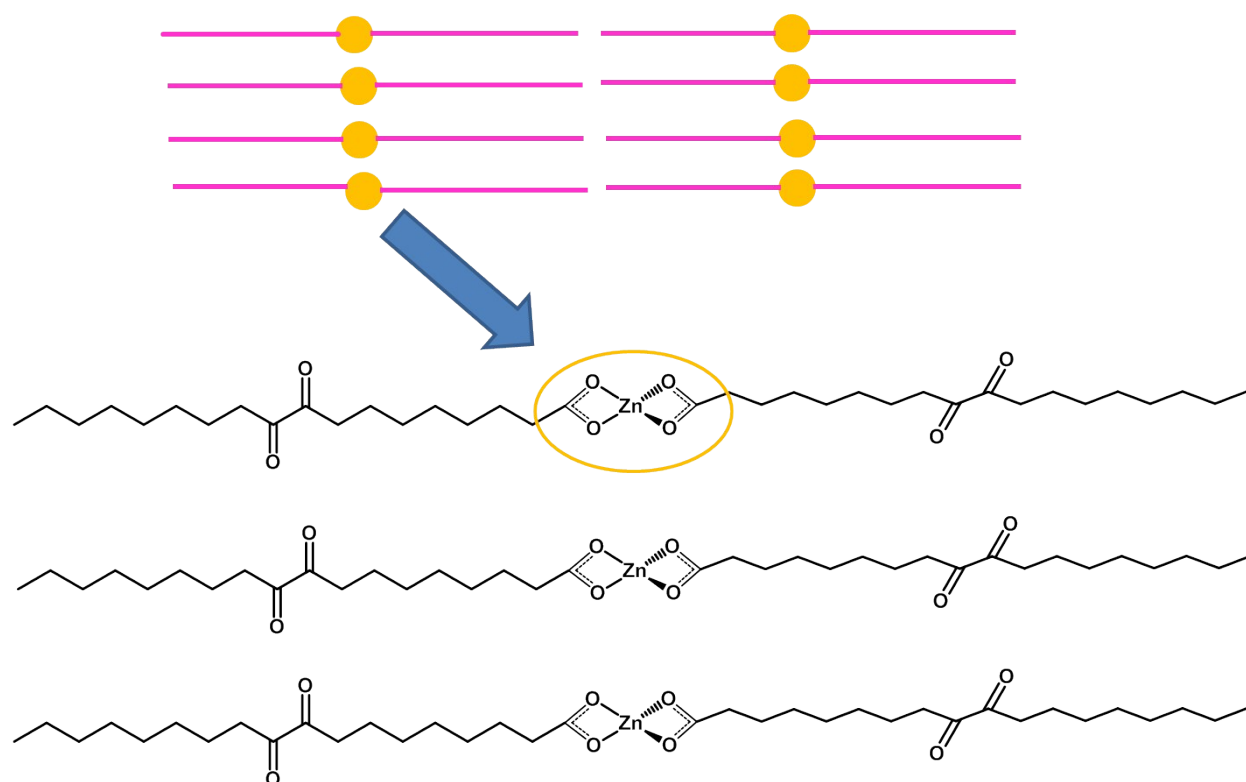

**Figure S11.** Schematic representation of the proposed molecular packing arrangement for neat DODA-Zn.

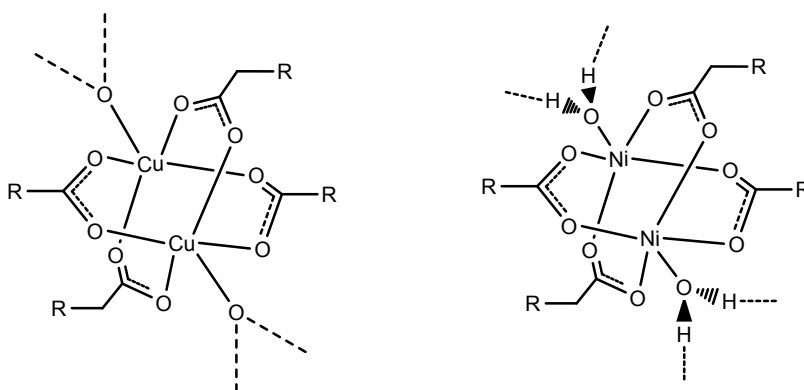

**Figure S12.** Schematic representation of the proposed dimeric molecular packing arrangement for neat **DODA-Cu** and **DODA-Ni • H<sub>2</sub>O**. R group represents a polymethylene chain.

References:

1. M. Zhang and R. G. Weiss, *Chem. Eur. J.*, 2016, **22**, 8262-8272.
2. A. Gómez-Zavaglia and R. Fausto, *J. Mol. Struct.*, 2003, **661–662**, 195-208.
3. H. A. Barnes, *J. Non-Newton. Fluid*, 1997, **70**, 1-33.
4. J. Mewis and N. J. Wagner, *Adv. Colloid Interface Sci.*, 2009, **147-48**, 214-227.
